# Supplementary material for: Prognostic implication of systemic inflammatory markers in young patients with resectable colorectal cancer
Source: PubMed Central journal article supplement — Ann Surg Treat Res. 2020 Dec 30;100(1):25–32. doi: 10.4174/astr.2021.100.1.25 (PMC7791188; doi:10.4174/astr.2021.100.1.25), 2020-12-30
Supplement: astr-100-25-s001.pdf [file astr-100-25-s001.pdf]

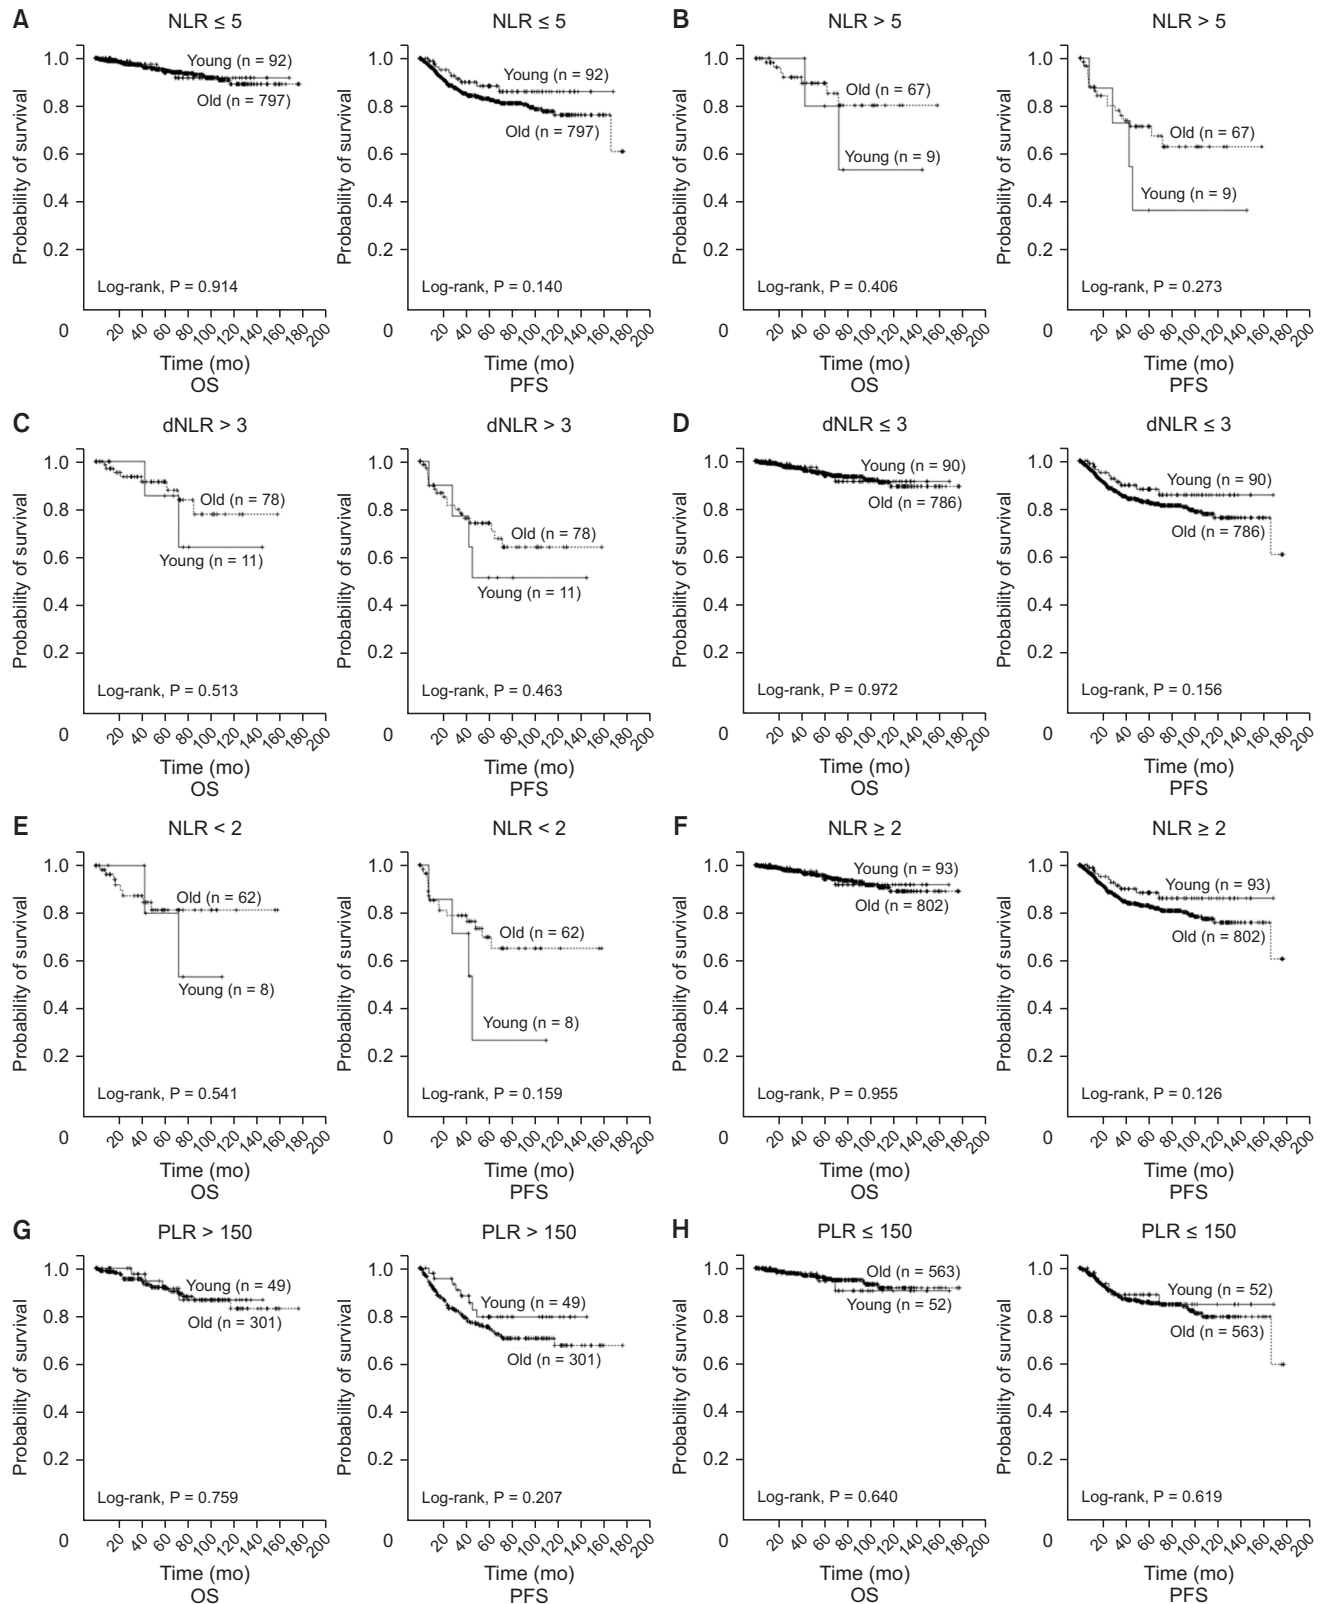

**Supplementary Fig. 1.** Overall survival (OS) and progression-free survival (PFS) according to age in each following group. No significant difference in OS or PFS according to age in each of the following group of patients. (A) neutrophil-to-lymphocyte ratio (NLR) ≤ 5, (B) NLR > 5, (C) derived NLR (dNLR) > 3, (D) dNLR ≤ 3, (E) lymphocyte-to-monocyte ratio (LMR) < 2, (F) LMR ≥ 2, (G) platelet-to-lymphocyte ratio (PLR) > 150, (H) PLR ≤ 150, (I) prognostic nutritional index (PNI) < 45, and (J) PNI ≥ 45.

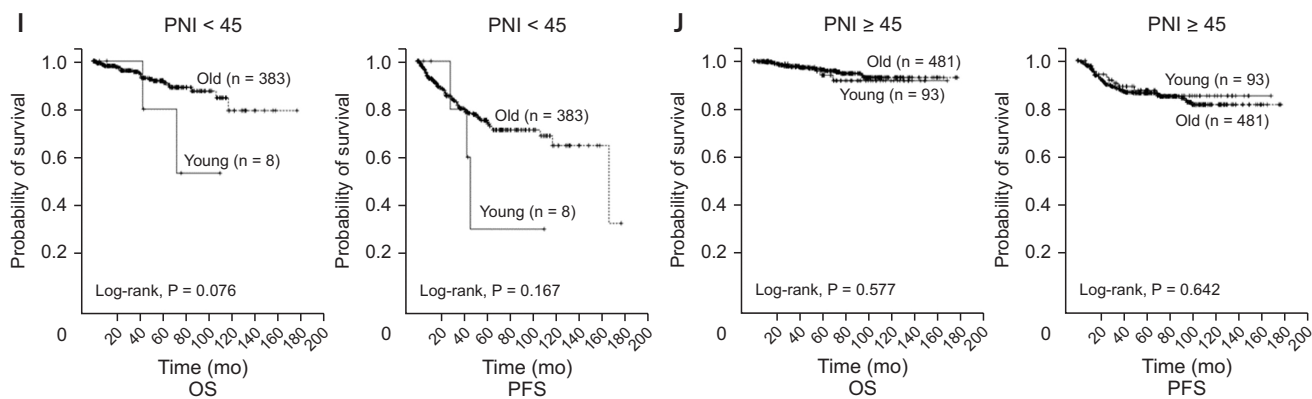

Supplementary Fig. 1. Continued.
